# Supplementary material for: Modeling spatial variation in risk of presence and insecticide resistance for malaria vectors in Laos
Source: PLoS One. 2017 May 11;12(5):e0177274. doi: 10.1371/journal.pone.0177274 (PMC5426714; doi:10.1371/journal.pone.0177274)
Supplement: S1 Table — (XLSX) [file pone.0177274.s001.xlsx]

## Sheet: Districts
ID_District	Name	ID_Province	Name_Province	Y4_2014_01	Y4_2014_02	Y4_2014_03	Y4_2014_04	Y4_2014_05	Y4_2014_06	Y4_2014_07	Y4_2014_08	Y4_2014_09	Y4_2014_10	Y4_2014_11	Y4_2014_12	Y4_2014	Y10	Y8	Y11_2014	Y12_2014	Y13_2014
1101	Pakxan	11	Borikhamxay	0.0430209	0.0430209	0.073486	0.117136	0.319413	0.304008	0.234187	0.320635	0.298288	0.102298	0.0430209	0.0430209	0.161794	0.368711	0.368711	0.0593458	0.0137474	0.0276206
1102	Thaphabat	11	Borikhamxay	0.0346582	0.0346582	0.0410353	0.0880048	0.216761	0.250797	0.253848	0.253854	0.214751	0.0698783	0.0346582	0.0346582	0.127297	0.135714	0.135714	0.014275	0.00138697	0.00360642
1103	Pakkading	11	Borikhamxay	0.0615513	0.0615513	0.0829206	0.155059	0.427004	0.452268	0.358945	0.440289	0.383772	0.116781	0.0615513	0.0615513	0.221937	0.242012	0.242012	0.0486969	0.00710395	0.0200586
1104	Borikhan	11	Borikhamxay	0.0551872	0.0551872	0.0699893	0.135375	0.376538	0.403953	0.387019	0.411377	0.344693	0.113538	0.0551872	0.0551872	0.205269	0.173047	0.173047	0.0331776	0.000808805	0.0104643
1105	Khamkeut	11	Borikhamxay	0.0436438	0.0436438	0.0441414	0.0849691	0.187053	0.229389	0.285224	0.284488	0.215911	0.0813026	0.0436438	0.0436438	0.132254	0.229582	0.229582	0.0267054	0.00113538	0.0101862
1106	Viangthong	11	Borikhamxay	0.0518972	0.0518972	0.053468	0.100928	0.262694	0.287398	0.350639	0.340233	0.262409	0.0838823	0.0518972	0.0518972	0.162437	0.120149	0.120149	0.0164909	0.000115966	0.00474493
1201	Thakhek	12	Khammuane	0.0381699	0.0381699	0.0395404	0.0821267	0.187062	0.278033	0.281526	0.283498	0.255121	0.0630735	0.0381699	0.0381699	0.135222	0.546811	0.546811	0.0751725	0.0144384	0.047496
1202	Mahaxai	12	Khammuane	0.0504366	0.0504366	0.0511547	0.108605	0.256383	0.336607	0.290359	0.354182	0.372544	0.122685	0.0516311	0.0504366	0.174622	0.378807	0.378807	0.0646481	0.005151	0.0276098
1203	Nongbok	12	Khammuane	0.0469155	0.0469155	0.0469155	0.0901098	0.169754	0.27182	0.337818	0.346405	0.278819	0.0785171	0.0469155	0.0469155	0.150652	0.77881	0.77881	0.117635	0.0263613	0.0919238
1204	Hinboun	12	Khammuane	0.0412947	0.0412947	0.0542182	0.0997864	0.263499	0.305576	0.181245	0.248579	0.269004	0.0729748	0.0412947	0.0412947	0.138338	0.307377	0.307377	0.0419537	0.00620356	0.0160044
1205	Gnommalat	12	Khammuane	0.0438834	0.0439073	0.0474866	0.098636	0.227097	0.288605	0.275446	0.320345	0.314724	0.109252	0.0457722	0.0438834	0.15492	0.322954	0.322954	0.0491502	0.0019352	0.0199826
1206	Boualapha	12	Khammuane	0.0374556	0.0376603	0.0412193	0.0800268	0.153518	0.158997	0.275979	0.269442	0.273364	0.15227	0.0725461	0.0393011	0.132648	0.188144	0.188144	0.0209335	0.000708273	0.00586665
1207	Nakay	12	Khammuane	0.0691303	0.0691317	0.0748438	0.148333	0.297035	0.371229	0.447084	0.463249	0.394183	0.152103	0.0722442	0.0691303	0.218975	0.112122	0.112122	0.0230352	0.000449898	0.0059959
1208	Xebangfai	12	Khammuane	0.0547156	0.0547156	0.0547156	0.114505	0.245441	0.365265	0.394541	0.404141	0.371496	0.103247	0.0547156	0.0547156	0.189351	0.425976	0.370212	0.0698578	0.0112441	0.0317019
1209	Xaibouathong	12	Khammuane	0.0554689	0.0554689	0.0557661	0.11552	0.250782	0.292057	0.414309	0.414309	0.411491	0.162516	0.0624461	0.0554689	0.195467	0.435623	0.218238	0.0397125	0.0176105	0.0095902
1301	"Kaysone Phomvih	13	Savannakhet	0.0367192	0.0367192	0.0367192	0.0641685	0.104555	0.163874	0.18484	0.21868	0.176879	0.0627111	0.0367192	0.0367192	0.0966087	0.758416	0.758416	0.0720613	0.00758845	0.0545982
1302	Outhoumphon	13	Savannakhet	0.0633879	0.0633879	0.0633879	0.114756	0.213129	0.324295	0.4135	0.436143	0.355898	0.108517	0.0633879	0.0633879	0.190265	0.681816	0.573828	0.106896	0.0218179	0.0624659
1303	Atsaphangthong	13	Savannakhet	0.0610786	0.0610786	0.0610786	0.108322	0.214775	0.270742	0.423665	0.416602	0.378068	0.11645	0.0610786	0.0610786	0.186168	0.620388	0.569374	0.107714	0.0178009	0.0654309
1304	Phin	13	Savannakhet	0.0545026	0.0545026	0.0545778	0.109252	0.21405	0.226896	0.375534	0.372932	0.364437	0.142875	0.0597282	0.0545026	0.173649	0.313826	0.169173	0.0283339	0.0130925	0.00632362
1305	Xepon	13	Savannakhet	0.0277717	0.0277717	0.0290443	0.0574762	0.103718	0.10661	0.188327	0.184841	0.202388	0.110874	0.0575095	0.0287485	0.0937566	0.391131	0.339634	0.026932	0.0022279	0.0103021
1306	Nong	13	Savannakhet	0.0255006	0.0255006	0.0277992	0.0572027	0.0974385	0.114666	0.180044	0.176404	0.173436	0.0856984	0.0457882	0.0261037	0.0862985	0.344291	0.275161	0.0195835	0.0024713	0.00573784
1307	Thapangthong	13	Savannakhet	0.051823	0.051823	0.051823	0.101581	0.193526	0.216755	0.358229	0.334913	0.322236	0.103595	0.051823	0.051823	0.157496	0.311803	0.142178	0.0232131	0.015077	0.00460607
1308	Songkhon	13	Savannakhet	0.0461716	0.0461716	0.0461716	0.0745767	0.147261	0.178669	0.275948	0.267697	0.267905	0.0750229	0.0461716	0.0461716	0.126495	0.527083	0.527083	0.0676565	0.016649	0.0389379
1309	Champhon	13	Savannakhet	0.0567939	0.0567939	0.0567939	0.0912271	0.177119	0.218526	0.332328	0.326089	0.322192	0.0875147	0.0567939	0.0567939	0.153247	0.75712	0.75712	0.115676	0.015502	0.0891534
1310	Xonbouri	13	Savannakhet	0.0430394	0.0430394	0.0430394	0.0756749	0.150746	0.168236	0.279685	0.271829	0.269562	0.0857202	0.0430394	0.0430394	0.126387	0.529862	0.44287	0.056804	0.0114577	0.0290405
1311	Xaibouri	13	Savannakhet	0.043701	0.043701	0.043701	0.0833293	0.153538	0.245551	0.304348	0.317933	0.251328	0.0751261	0.043701	0.043701	0.137472	0.607285	0.573913	0.0804041	0.0192207	0.0511069
1312	Vilabouri	13	Savannakhet	0.0500552	0.0500552	0.0505181	0.102658	0.205619	0.210667	0.35738	0.356548	0.368001	0.168869	0.0778355	0.0501287	0.170695	0.356937	0.297375	0.0487939	0.0103743	0.017317
1313	Atsaphon	13	Savannakhet	0.062351	0.062351	0.062351	0.124921	0.257622	0.328291	0.464716	0.464716	0.418216	0.140754	0.062351	0.062351	0.209249	0.513253	0.384187	0.0759775	0.0172451	0.0322823
1314	Xaiphouthong	13	Savannakhet	0.0580957	0.0580957	0.0580957	0.0943531	0.173603	0.229438	0.309105	0.321222	0.307705	0.0896568	0.0580957	0.0580957	0.151297	0.586648	0.586648	0.0906238	0.0187264	0.0551778
1315	Phalanxai	13	Savannakhet	0.0664909	0.0664909	0.0664909	0.127628	0.260492	0.289776	0.476512	0.470017	0.447249	0.162539	0.0664909	0.0664909	0.213889	0.466017	0.203244	0.0422838	0.0265777	0.0104143
1401	Saravan	14	Saravane	0.0674935	0.0674935	0.0693234	0.149162	0.248975	0.316475	0.484724	0.441696	0.378319	0.154284	0.068604	0.0674935	0.209504	0.424219	0.373731	0.071464	0.0178332	0.0361708
1402	Ta-Oy	14	Saravane	0.0503009	0.0503009	0.062469	0.120505	0.205545	0.277951	0.2435	0.312621	0.292695	0.146831	0.0715236	0.0504859	0.157061	0.238812	0.238812	0.0300813	0.00077213	0.0102767
1403	Toumlan	14	Saravane	0.0558029	0.0558029	0.0558029	0.118812	0.206568	0.245246	0.402201	0.377207	0.334158	0.137379	0.0558946	0.0558029	0.175056	0.499927	0.49804	0.0908607	0.00837862	0.0535258
1404	Lakhonpheng	14	Saravane	0.0582977	0.0582977	0.0582977	0.106297	0.208225	0.249024	0.402917	0.3713	0.364272	0.110462	0.0582977	0.0582977	0.175332	0.325951	0.293875	0.051714	0.014148	0.0207646
1405	Vapi	14	Saravane	0.0657022	0.0657022	0.065957	0.144484	0.256466	0.292354	0.482396	0.427798	0.407553	0.134005	0.0657022	0.0657022	0.206152	0.398658	0.320047	0.0641355	0.0197506	0.0265626
1406	Khongxedon	14	Saravane	0.0547551	0.0547551	0.0547551	0.107584	0.20865	0.245518	0.40724	0.364596	0.369001	0.117925	0.0547551	0.0547551	0.174524	0.517217	0.445649	0.0806029	0.0209154	0.0449009
1407	Laongam	14	Saravane	0.0373042	0.0373042	0.043697	0.0984995	0.177363	0.188637	0.249784	0.226103	0.220643	0.0815063	0.037764	0.0373042	0.119659	0.622956	0.520636	0.0616971	0.0153095	0.0325515
1408	Samouay	14	Saravane	0.0322206	0.0320485	0.0418763	0.0733023	0.124031	0.166927	0.207177	0.228135	0.206092	0.12137	0.0630856	0.0335418	0.110817	0.355171	0.338168	0.0298709	0.00184333	0.011286
1501	Laman	15	Sekong	0.0496231	0.0496231	0.0548112	0.116009	0.209067	0.283281	0.331063	0.352399	0.310929	0.144684	0.0646951	0.0496231	0.167984	0.212296	0.0685931	0.012049	0.0166535	0.00156275
1502	Karum	15	Sekong	0.0757057	0.0757057	0.100885	0.179343	0.311693	0.446696	0.199727	0.356913	0.413705	0.224829	0.109218	0.0758465	0.214189	0.130677	0.0326693	0.00721919	0.0187148	0.000387663
1503	Dakchung	15	Sekong	0.0451009	0.0451009	0.0620981	0.10562	0.189066	0.253573	0.103934	0.18374	0.227322	0.128946	0.0655943	0.0451009	0.121266	0.226516	0.152386	0.0161063	0.0051291	0.0030073
1504	Thateng	15	Sekong	0.0551903	0.0551903	0.0657724	0.154229	0.282326	0.32863	0.402963	0.374329	0.330863	0.128126	0.0552756	0.0551903	0.190674	0.55805	0.401015	0.0755961	0.0321723	0.0305852
1601	Pakxe	16	Champasack	0.0457922	0.0457922	0.0457922	0.091216	0.211739	0.224692	0.341715	0.341715	0.298699	0.121368	0.0457922	0.0457922	0.155009	0.902417	0.902417	0.139883	0.02238	0.126232
1602	Xanasomboun	16	Champasack	0.0521035	0.0521035	0.0523406	0.103873	0.21812	0.263589	0.388478	0.380985	0.356436	0.12376	0.0521035	0.0521035	0.174666	0.501642	0.424264	0.0796056	0.023612	0.0454397
1603	Bachiangchareuns	16	Champasack	0.0535612	0.0535612	0.0613668	0.128753	0.252966	0.261172	0.377913	0.363885	0.352045	0.131743	0.0538214	0.0535612	0.178696	0.551616	0.467999	0.0819978	0.0232201	0.0454765
1604	Pakxong	16	Champasack	0.045637	0.045637	0.0691446	0.13318	0.254863	0.272506	0.0975159	0.207106	0.254774	0.116861	0.0548538	0.045637	0.133143	0.143416	0.114814	0.0123759	0.00930221	0.0028382
1605	Pathoumphon	16	Champasack	0.0714308	0.0714308	0.0716855	0.121515	0.350232	0.410159	0.49897	0.533013	0.530708	0.201874	0.0714308	0.0714308	0.250323	0.252094	0.166096	0.0369764	0.0140163	0.0113981
1606	Phonthong	16	Champasack	0.0564599	0.0564599	0.0564599	0.0882947	0.22903	0.300683	0.420616	0.420616	0.360764	0.143636	0.0564599	0.0564599	0.187162	0.548727	0.496052	0.0947423	0.0349175	0.0586044
1607	Champasak	16	Champasack	0.0629887	0.0629887	0.0632725	0.104436	0.287473	0.302941	0.460073	0.47022	0.452917	0.164184	0.0629887	0.0629887	0.213123	0.545217	0.454886	0.0983092	0.0283254	0.0492857
1608	Soukhouma	16	Champasack	0.068837	0.068837	0.068837	0.0924951	0.292284	0.352514	0.512868	0.514566	0.514443	0.188166	0.068837	0.068837	0.234293	0.430355	0.246569	0.0564114	0.0284263	0.0183732
1609	Mounlapamok	16	Champasack	0.0671636	0.0671636	0.0671636	0.0945499	0.270416	0.371976	0.487207	0.47878	0.503044	0.22277	0.0671785	0.0671636	0.230381	0.196359	0.124735	0.0288795	0.0138006	0.00918445
1610	Khong	16	Champasack	0.0616553	0.0616553	0.0616553	0.0930264	0.262947	0.35539	0.432843	0.416474	0.460791	0.216764	0.0641335	0.0616553	0.212416	0.400347	0.283802	0.0600117	0.023875	0.0244716
1701	Xaisettha	17	Attapeu	0.0750975	0.0750975	0.0750975	0.130592	0.314228	0.461071	0.560169	0.560169	0.558154	0.26557	0.112142	0.0750975	0.271874	0.512948	0.153575	0.0411728	0.0456092	0.00694158
1702	Samakkhixai	17	Attapeu	0.0687117	0.0687117	0.0714191	0.140775	0.31889	0.439046	0.487096	0.508187	0.501973	0.222087	0.0860871	0.0687117	0.248475	0.556118	0.303385	0.0749805	0.0278763	0.0246773
1703	Sanamxai	17	Attapeu	0.0593899	0.0593899	0.0643136	0.118028	0.300396	0.375079	0.375905	0.42332	0.423904	0.171516	0.0615423	0.0593899	0.207681	0.222411	0.0556028	0.012318	0.0207586	0.00129997
1704	Sanxai	17	Attapeu	0.0661113	0.0661113	0.0775115	0.151373	0.306369	0.412898	0.393296	0.44692	0.444463	0.227618	0.104597	0.0661113	0.230282	0.120854	0.0450138	0.0086378	0.0134726	0.000713135
1705	Phouvong	17	Attapeu	0.0632545	0.0632545	0.0653125	0.128169	0.330111	0.437124	0.362591	0.428147	0.444871	0.212199	0.0787637	0.0632545	0.223088	0.0660308	0.0165077	0.00401983	0.0115245	0.000219713

## Sheet: Provinces
ID_Province	Name	Y4_2014	Y8	Y10	Y11_2014	Y12_2014	Y13_2014
11	Borikhamxay	0.164601	0.189355	0.189355	0.0280895	0.00221049	0.0101753
12	Khammuane	0.168948	0.263389	0.277581	0.0405958	0.00488622	0.0166687
13	Savannakhet	0.150608	0.369929	0.460496	0.0531815	0.013071	0.0265824
14	Saravane	0.171842	0.348136	0.386855	0.0559529	0.0115897	0.0265655
15	Sekong	0.171862	0.102366	0.204838	0.0152394	0.014459	0.00329277
16	Champasack	0.199111	0.243114	0.321159	0.0471997	0.0184755	0.0211422
17	Attapeu	0.226941	0.0609897	0.176298	0.0141462	0.0173024	0.00259121
